# Supplementary material for: Highly efficient ˙OH generation in Fenton-like reactions over a bioinspired manganese single-atom site
Source: Royal Society of Chemistry journal article supplement (doi:10.1039/d3nj02359a), 2023-01-01
Supplement: d3nj02359a1.pdf [file d3nj02359a1.pdf]

## Supporting Information

### Highly efficient •OH generation in Fenton-like reactions over bioinspired manganese single-atom site

Man Yang<sup>\*,a</sup> and Yujing Ren<sup>b,c</sup>

<sup>a</sup> School of Materials Science and Engineering, Xi'an University of Technology, Xi'an 710048, China.

<sup>b</sup> School of Life Sciences, Northwestern Polytechnical University, Xi'an, 710072, Shaanxi, China.

<sup>c</sup> Chongqing Innovation Center, Northwestern Polytechnical University, Chongqing, 401135, China.

\* To whom correspondence should be addressed. [myang@xaut.edu.cn](mailto:myang@xaut.edu.cn) (M. Yang)

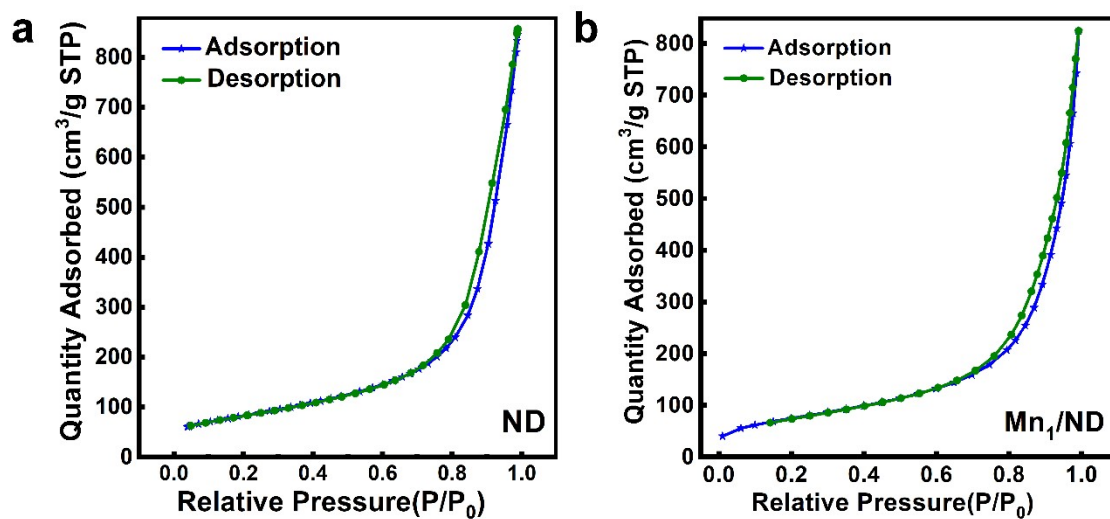

Figure S1. Nitrogen adsorption-desorption isotherm of (a) ND and (b) Mn<sub>1</sub>/ND samples.

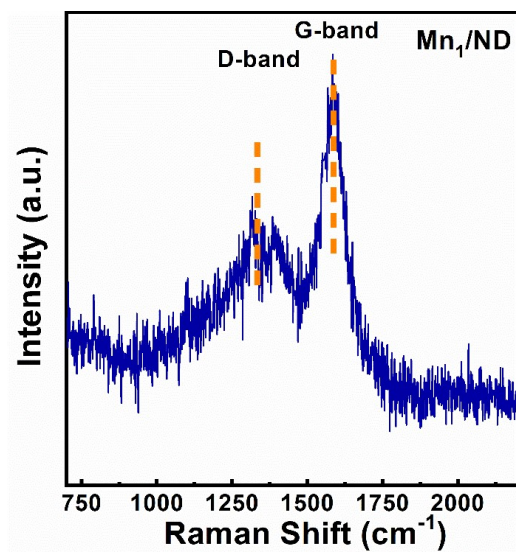

Figure S2. Raman result of and Mn<sub>1</sub>/ND catalyst.

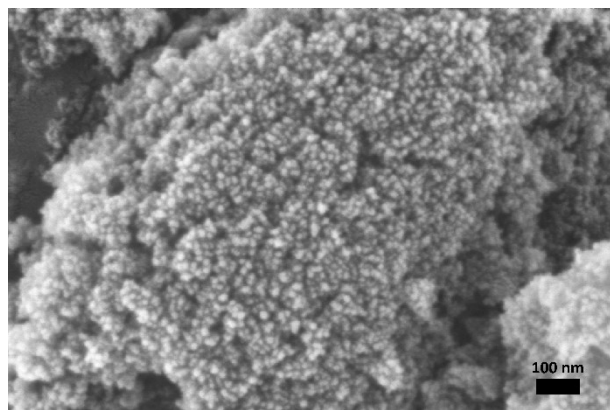

**Figure S3.** FESEM images of Mn<sub>1</sub>/ND catalyst.

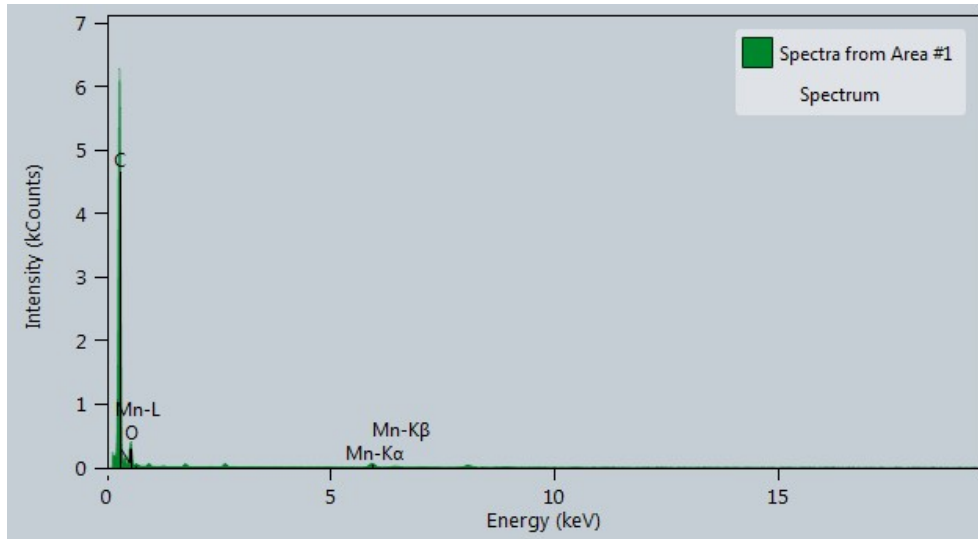

**Figure S4.** EDS spectra of Mn<sub>1</sub>/ND sample.

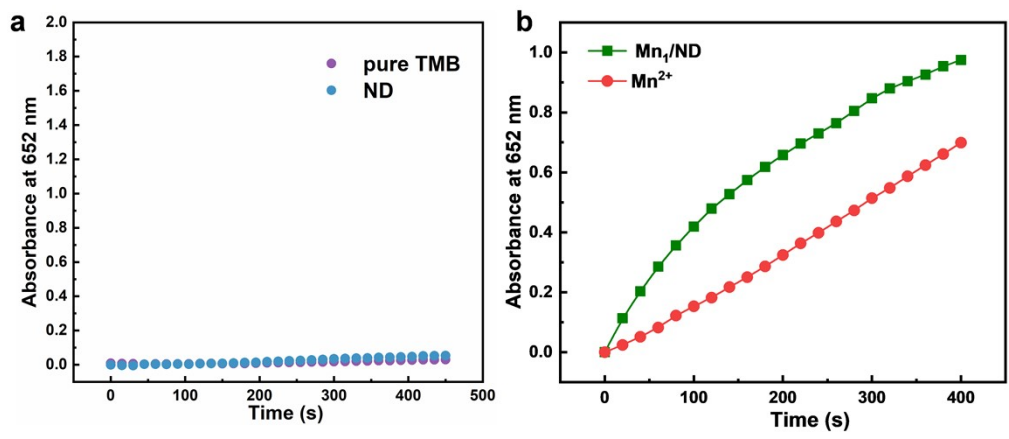

Figure S5. Peroxidase-like activity of TMB oxidation in different catalytic system.

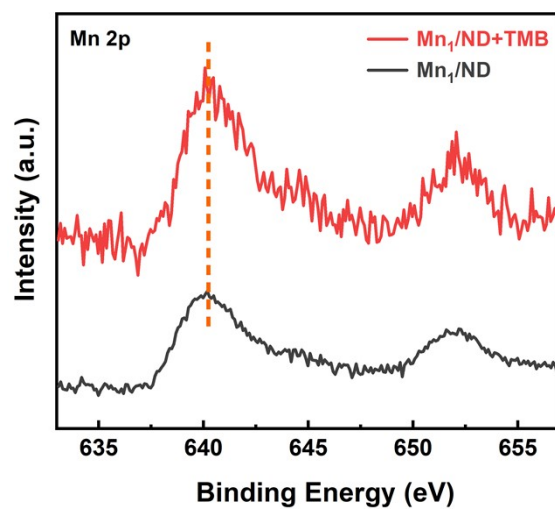

**Figure S6.** The XPS spectra of Mn 2p in Mn<sub>1</sub>/ND+TMB sample.

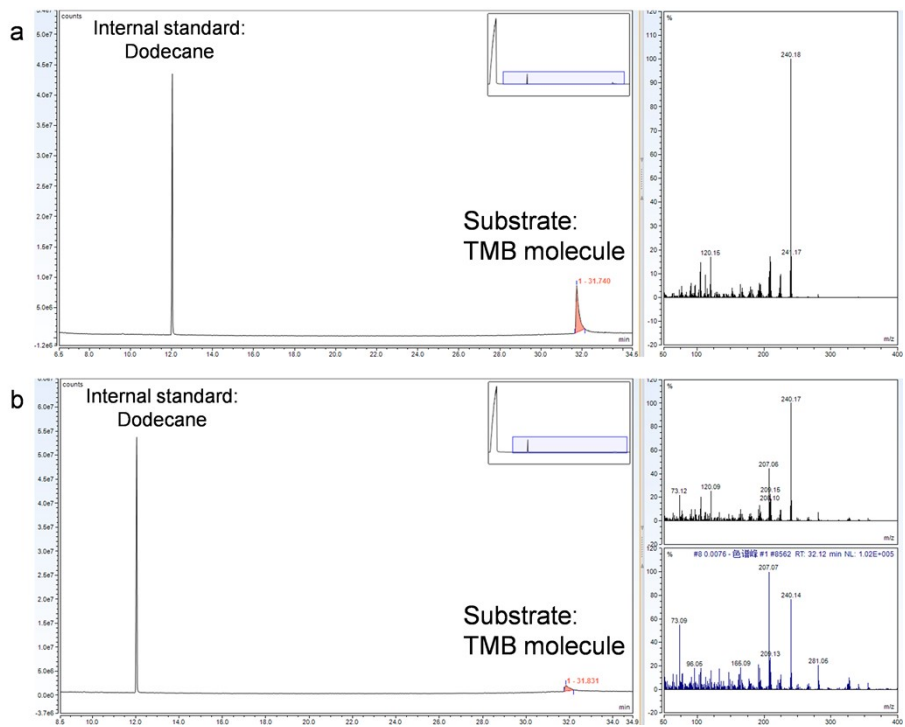

**Figure S7.** The GC-MS results of (a) blank experiment and (b) TMB adsorption on Mn<sub>1</sub>-ND catalyst. After the normalization of internal standard intensity, it is obviously showed that the intensity of TMB molecule in Fig. S7b is much lower than that in Fig. S7a, which indicates that the TMB is adsorbed on the Mn<sub>1</sub>-ND catalyst.



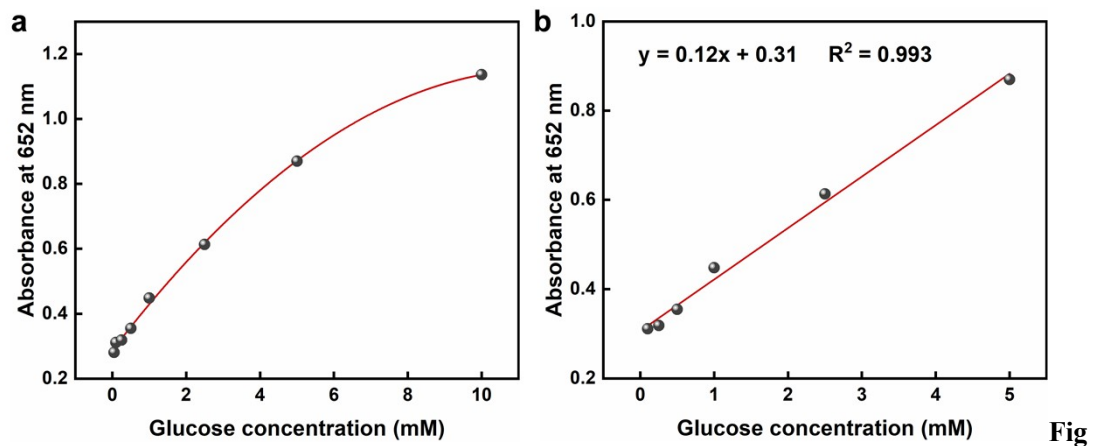

**Figure S8.** (a) Plots of peak absorbance values versus glucose concentration; (b) Linear calibration plot for glucose.

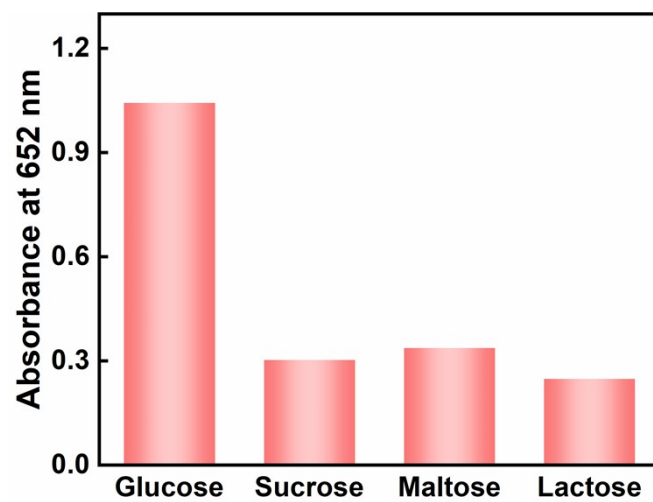

**Figure S9.** Specificity of the method. The glucose concentration was 1 mM. The concentrations of sucrose, maltose and lactose were 10 mM, respectively.

**Table S1.** ICP-OES results of Mn<sub>1</sub>/ND catalyst.

| Sample              | M loading (wt%) |
|---------------------|-----------------|
| Mn <sub>1</sub> /ND | 1.15            |

**Table S2.** BET surface area of ND and Mn<sub>1</sub>/ND samples.

| Sample              | S <sub>BET</sub> (m <sup>2</sup> /g) |
|---------------------|--------------------------------------|
| ND                  | 297.2                                |
| Mn <sub>1</sub> /ND | 272.8                                |

**Table S3.** The mass fraction of Mn species from EDS spectra analysis.

| Sample              | Element | Family | Mass fraction (%) | Mass error (%) | Ratio of mass fraction to mass error |
|---------------------|---------|--------|-------------------|----------------|--------------------------------------|
| Mn <sub>1</sub> /ND | Mn      | K      | 1.77              | 0.24           | 7.3                                  |
|                     | C+N+O   | K      | 98.23             | -              | -                                    |

**Table S4.** N 1s XPS analysis results of ND and Mn<sub>1</sub>/ND samples.

| Sample              | N species   | Binding energy (eV) | Proportion (%) [a] | Surface N <sub>(M-N)</sub> /Mn atomic ratio [b] |
|---------------------|-------------|---------------------|--------------------|-------------------------------------------------|
| ND                  | Pyridinic N | 398.4               | 81.3               | -                                               |
|                     | Graphitic N | 401.9               | 18.7               | -                                               |
| Mn <sub>1</sub> /ND | Pyridinic N | 398.3               | 59.8               | -                                               |
|                     | M-N         | 399.8               | 20.9               | 4.3                                             |
|                     | Graphitic N | 402.4               | 19.3               | -                                               |

[a] Proportion of the nitrogen species in all nitrogen.

[b] The surface N/Mn atomic ratio was calculated according to supplementary equation:

$$n_i/n_j = I_i/I_j \times \sigma_j/\sigma_i \times E_{kj}^{0.5}/E_{ki}^{0.5}$$

i: N species; j: Mn species; n: the numbers of surface atom; I: the intensity of XPS peak area;

$\sigma$ : photoionization cross section;

Al<sub>K $\alpha$</sub> : N 1s = 1.8, Mn 2p<sub>3/2</sub> = 9.2;

E<sub>k</sub>: photoelectron kinetic energy, E<sub>k</sub> = hv (Al<sub>K $\alpha$</sub> , hv = 1486.6 eV) – BE (Binding Energy);

**Table S5.** The best-fitted EXAFS results of Mn<sub>1</sub>/ND catalyst.<sup>[a]</sup>

| Sample              | Shell | CN  | R (Å) | $\sigma^2$ (10 <sup>-2</sup> Å <sup>2</sup> ) | $\Delta E_0$ (eV) | r-factor (%) |
|---------------------|-------|-----|-------|-----------------------------------------------|-------------------|--------------|
| Mn <sub>1</sub> /ND | Mn-N  | 3.7 | 1.95  | 1.2                                           | -10.0             | 0.6          |

[a] CN is the coordination number for the absorber-backscatterer pair, R is the average absorber-backscatterer distance,  $\sigma^2$  is the Debye-Waller factor, and  $\Delta E_0$  the inner potential correction. For Mn K-edge EXAFS spectra fitting, the S<sub>0</sub><sup>2</sup> value is 0.95. The accuracies of the above parameters are estimated as CN,  $\pm 20\%$ ; R,  $\pm 1\%$ ;  $\sigma^2$ ,  $\pm 20\%$ ;  $\Delta E_0$ ,  $\pm 20\%$ . The data range used for data fitting in k-space ( $\Delta k$ ) and R-space ( $\Delta R$ ) are 3.0-9.0 Å<sup>-1</sup> and 1.0-2.0 Å, respectively.

**Table S6.** TOF of TMB oxidation over Mn<sub>1</sub>/ND and reported catalysts.

| Catalyst              | TOF<br>(min <sup>-1</sup> ) | Ref       |
|-----------------------|-----------------------------|-----------|
| Mn <sub>1</sub> /ND   | 9.6                         | This work |
| FeBNC                 | 5.9                         | 1         |
| Fe-N-C SA             | 3.2                         | 2         |
| Fe SAEs               | 6.7                         | 3         |
| Co/A-TiO <sub>2</sub> | 1.1                         | 4         |
| Ni/MOF                | 0.003                       | 5         |
| aNiPc                 | 0.014                       | 6         |
| Cu-HCSs               | 0.022                       | 7         |

**Table S7.** DFT calculation results of the H<sub>2</sub>O<sub>2</sub> adsorbed on Mn<sub>1</sub>-N<sub>4</sub> site.

| System                          | E <sub>ads</sub> (eV) |
|---------------------------------|-----------------------|
| Mn <sub>1</sub> -N <sub>4</sub> | -2.8 eV               |

**Table S8.** N 1s XPS analysis results of Mn<sub>1</sub>/ND+TMB samples.

| Sample                  | N species   | Binding energy (eV) | Proportion (%) [a] |
|-------------------------|-------------|---------------------|--------------------|
| Mn <sub>1</sub> /ND+TMB | Pyridinic N | 398.3               | 43.5               |
|                         | Adsorbed N  | 399.3               | 30.6               |
|                         | M-N         | 399.9               | 15.3               |
|                         | Graphitic N | 403.0               | 10.6               |

[a] Proportion of the nitrogen species in all nitrogen.

**Table S9.** ICP-OES result of Mn<sub>1</sub>/ND-spent catalyst.

| Sample                    | M loading (wt%) |
|---------------------------|-----------------|
| Mn <sub>1</sub> /ND-spent | 1.06            |

## Reference

- (1) Jiao, L.; Xu, W. Q.; Zhang, Y.; Wu, Y.; Gu, W. L.; Ge, X. X.; Chen, B. B.; Zhu, C. Z.; Guo, S. J. Boron-doped Fe-N-C single-atom nanozymes specifically boost peroxidase-like activity. *Nano Today* **2020**, *35*, 10.
- (2) Jiao, L.; Xu, W.; Yan, H.; Wu, Y.; Zhu, C. Fe-N-C single-atom nanozyme for the intracellular hydrogen peroxide detection. *Anal. Chem.* **2019**, *91*, 11994-11999.
- (3) Zhao, C.; Xiong, C.; Liu, X.; Qiao, M.; Li, Y. Unraveling the single atomic active site under realistic simulated natural heme-containing enzymes. *Chem. Comm.* **2019**, *55*, 16.
- (4) Wang, H.; Wang, Y.; Lu, L. L.; Ma, Q.; Feng, R. X.; Xu, S. Y.; James, T. D.; Wang, L. Y. Reducing valence states of Co active sites in a single-atom nanozyme for boosted tumor therapy. *Adv. Funct. Mater.* **2022**, *9*, 202200331.
- (5) Chen, J. Y.; Shu, Y.; Li, H. L.; Xu, Q.; Hu, X. Y. Nickel metal-organic framework 2D nanosheets with enhanced peroxidase nanozyme activity for colorimetric detection of H<sub>2</sub>O<sub>2</sub>. *Talanta* **2018**, *189*, 254-261.
- (6) Zhao, Y.; An, F. H.; Meng, J.; Zhu, Y. X.; Sun, X.; Zhang, X. M.; Sun, X. Nickel phthalocyanines as potential aggregation-induced antibacterial agents: Fenton-like pathways driven by near-infrared light. *ChemPhotoChem* **2022**, *6*, e202100233.
- (7) Xi, J. Q.; Wei, G.; An, L. F.; Xu, Z. B.; Xu, Z. L.; Fan, L.; Gao, L. Z. Copper/carbon hybrid nanozyme: Tuning catalytic activity by the copper state for antibacterial therapy. *Nano Lett.* **2019**, *19*, 7645-7654.
